# Supplementary figures and images for: Immortalization of T-Cells Is Accompanied by Gradual Changes in CpG Methylation Resulting in a Profile Resembling a Subset of T-Cell Leukemias
Source: PubMed Central journal article supplement — Neoplasia. 2014 Jul 22;16(7):606–15. doi: 10.1016/j.neo.2014.07.001 (PMC4198827; doi:10.1016/j.neo.2014.07.001), 2014-07-22

# Supplementary Figure S1

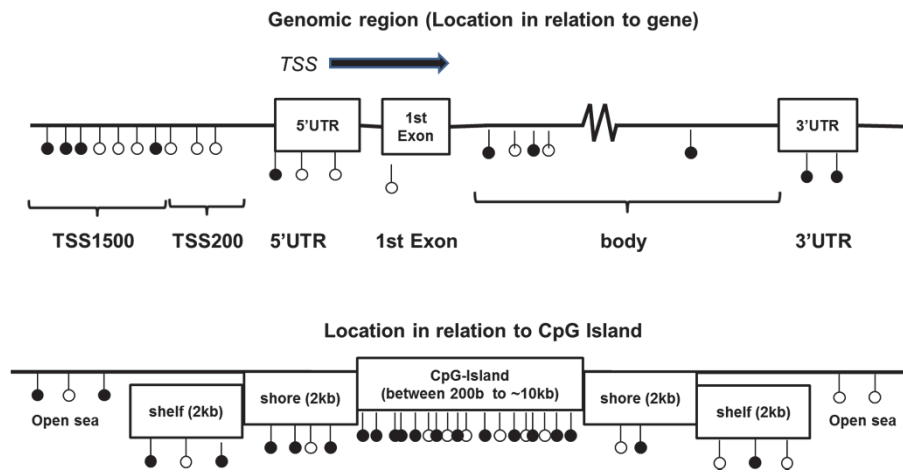

Supplement: mmc1.pdf [file mmc1.pdf]

## Supplementary Figure S2

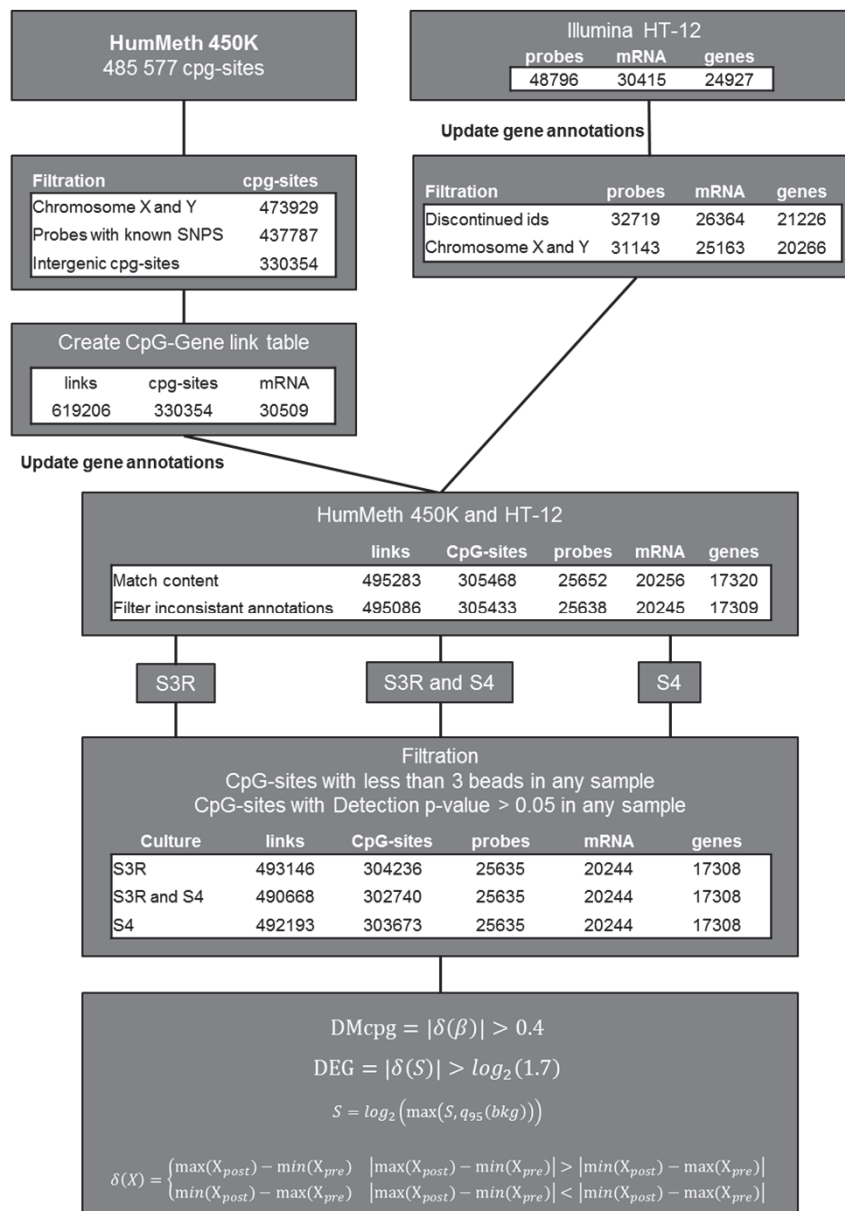

Supplement: mmc2.pdf [file mmc2.pdf]

Supplementary Figure S3

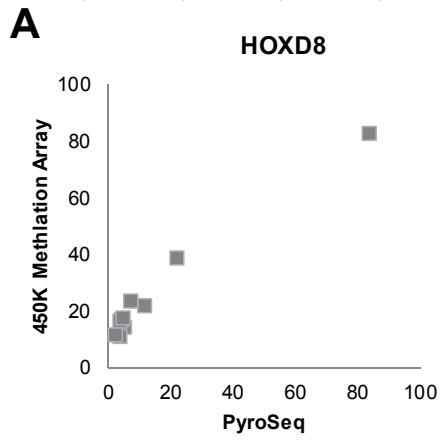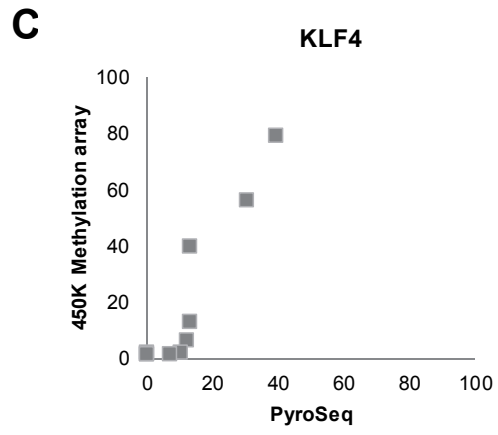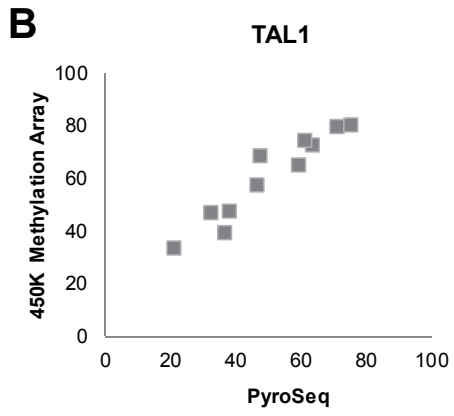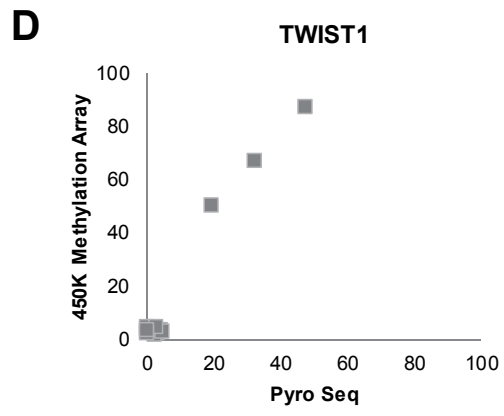

Supplement: mmc3.pdf [file mmc3.pdf]

Supplementary Figure S4

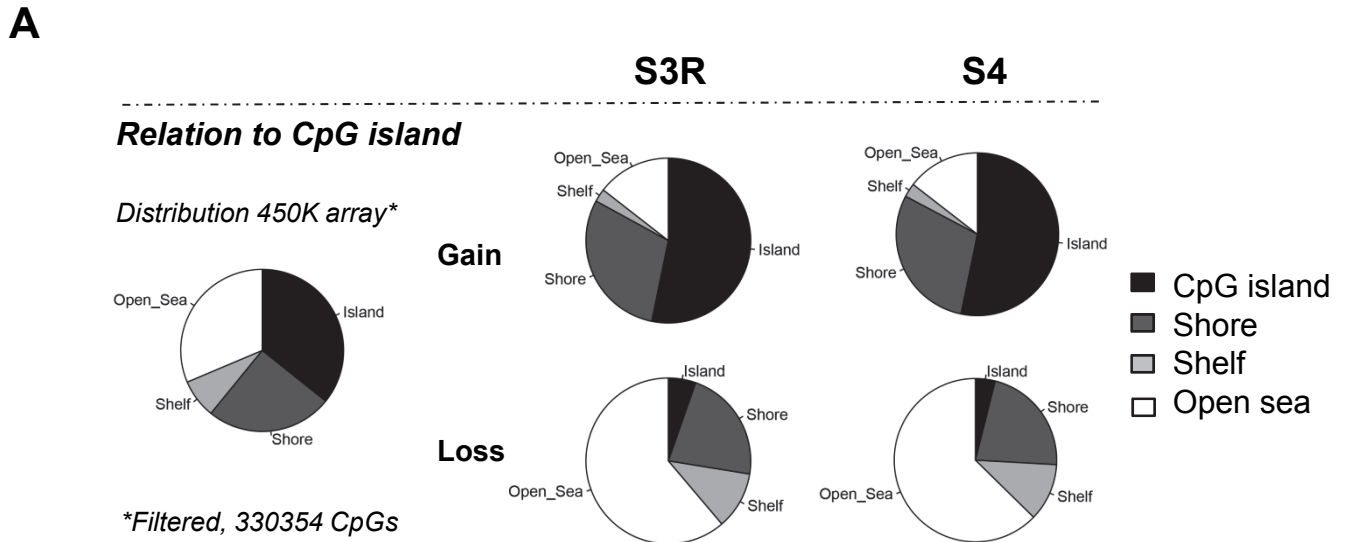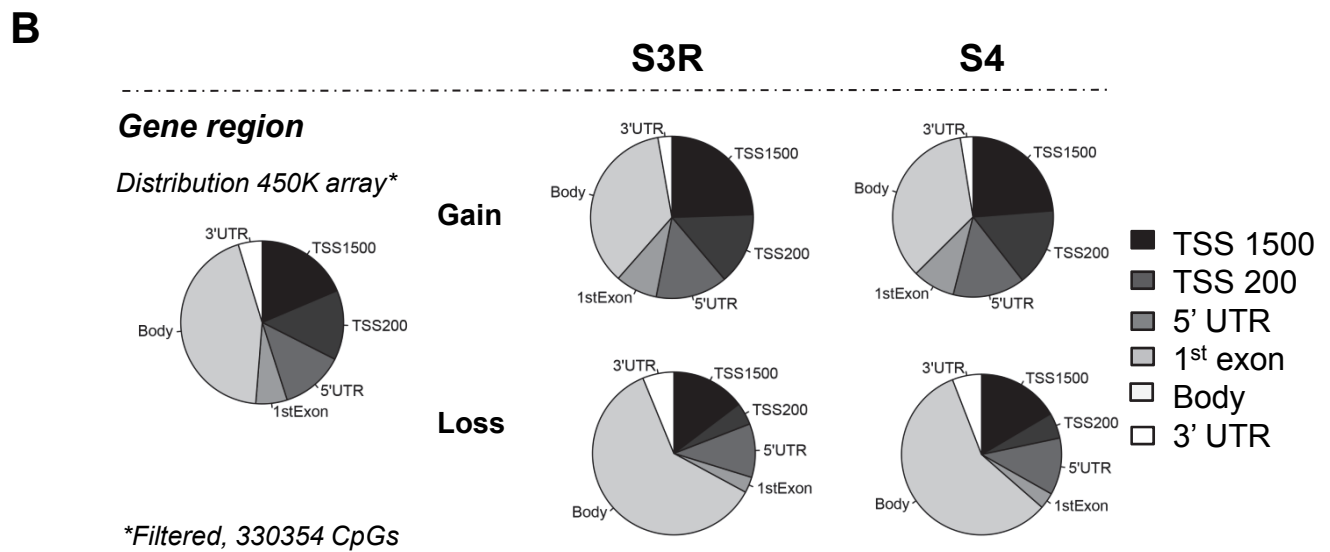

Supplement: mmc4.pdf [file mmc4.pdf]

# Supplementary Figure S5

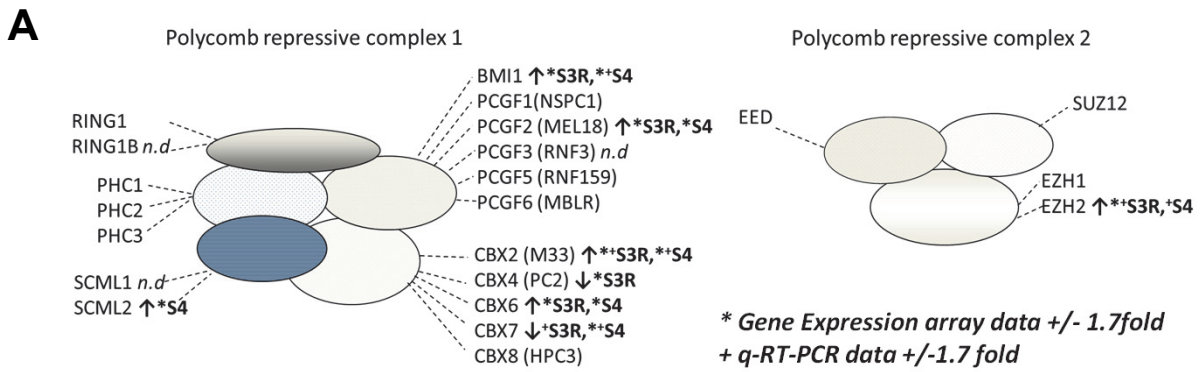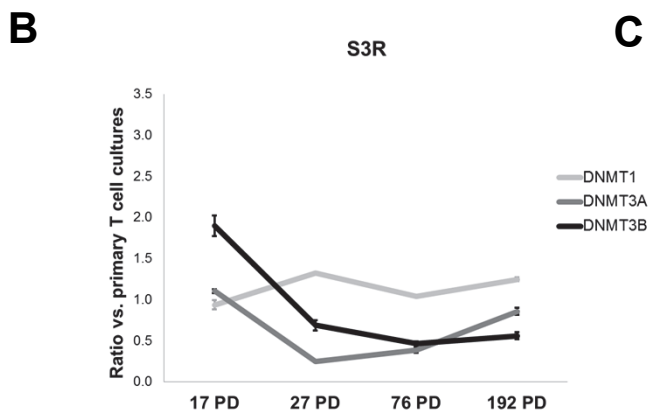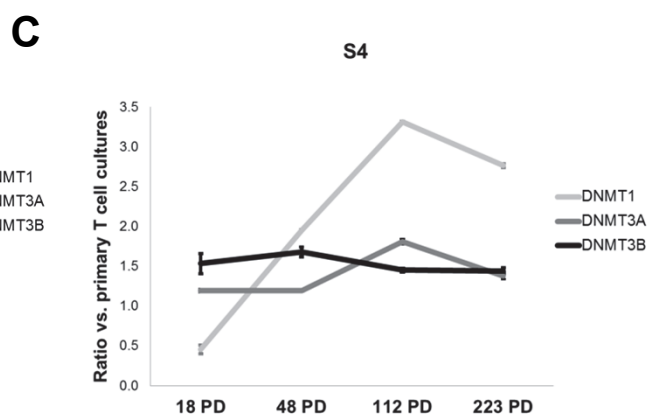

Supplement: mmc5.pdf [file mmc5.pdf]
